# Supplementary material
Source: publisher figshare collection journal article supplement (https://sage.figshare.com/ndownloader/files/22124904)
Supplement: Supplementary file 1 [file 22124904]

Supplementary Table 1.

*Definitions of ten motor O\*NET factors measured within each occupation kit.*

| ONET factor            | Definition                                                                                                                                    |
|------------------------|-----------------------------------------------------------------------------------------------------------------------------------------------|
| Arm-Hand Steadiness    | The ability to keep your hand and arm steady while moving your arm or while holding your arm and hand in one position.                        |
| Manual Dexterity       | The ability to quickly move your hand, your hand together with your arm, or your two hands to grasp, manipulate, or assemble objects.         |
| Finger Dexterity       | The ability to make precisely coordinated movements of the fingers or one or both hands to grasp, manipulate, or assemble very small objects. |
| Upper Extremity Speed  | The ability to make fast, simple, repeated movements of the fingers, hands, wrists, arms and shoulder.                                        |
| Static Strength        | The ability to exert maximum muscle force to lift, push, pull, or carry objects.                                                              |
| Explosive strength     | The ability to use short bursts of muscle force to propel oneself (as in jumping or sprinting) or to throw an object.                         |
| Dynamic strength       | The ability to exert muscle force repeatedly or continuously over time. This involves muscular endurance and resistance to muscle fatigue.    |
| Extent flexibility     | The ability to bend, stretch, twist, or reach with your arms, hands, or fingers.                                                              |
| Dynamic flexibility    | The ability to quickly and repeatedly bend, stretch, twist, or reach out with your arms, hands, or fingers.                                   |
| Bilateral coordination | The ability to coordinate the movement of your upper extremities together to complete a task.                                                 |
